# Supplementary material for: Self-Isolation and Quarantine during the UK’s First Wave of COVID-19. A Mixed-Methods Study of Non-Adherence
Source: MDPI journal article supplement (doi:10.3390/ijerph18137015), 2021-06-30
Supplement: s1 [file s1]

## Supplementary materials:

**Table S1.** Percentage of participants who did not adhere to SI rules and those who did by categorical explanatory variable.

| Explanatory variables                      | Adherence<br>(n) | Adherence<br>(%) | Non-<br>adherence<br>(n) | Non-<br>adherence<br>(%) |
|--------------------------------------------|------------------|------------------|--------------------------|--------------------------|
| Sample                                     | 158              | 62%              | 97                       | 38%                      |
| <b>Demographic factors</b>                 |                  |                  |                          |                          |
| Gender                                     |                  |                  |                          |                          |
| Female                                     | 138              | 78%              | 39                       | 22%                      |
| Male                                       | 18               | 60%              | 12                       | 40%                      |
| Other                                      | 2                | 100%             | 0                        | 0%                       |
| Ethnicity                                  |                  |                  |                          |                          |
| White                                      | 139              | 75.5%            | 45                       | 24.5%                    |
| BAME                                       | 19               | 76%              | 6                        | 24%                      |
| Language                                   |                  |                  |                          |                          |
| English as first language                  | 133              | 76.9%            | 40                       | 23.1%                    |
| English not as first<br>language           | 25               | 69.4%            | 11                       | 30.6%                    |
| Religion                                   |                  |                  |                          |                          |
| No religion                                | 95               | 71.4%            | 38                       | 28.6%                    |
| Christian                                  | 35               | 76.1%            | 11                       | 23.9%                    |
| Buddhist                                   | 3                | 100%             | 0                        | 0%                       |
| Hindu                                      | 1                | 100%             | 0                        | 0%                       |
| Jewish                                     | 14               | 93.3%            | 1                        | 6.7%                     |
| Muslim                                     | 5                | 100%             | 0                        | 0%                       |
| Sikh                                       | 1                | 100%             | 0                        | 0%                       |
| Other                                      | 4                | 80%              | 1                        | 20%                      |
| Highest qualification obtained             |                  |                  |                          |                          |
| No qualifications                          | 3                | 100%             | 0                        | 0%                       |
| GCSEs or equivalent                        | 12               | 85.7%            | 2                        | 14.3%                    |
| A Levels or equivalent                     | 11               | 84.6%            | 2                        | 15.4%                    |
| Vocational / work-related<br>qualification | 6                | 60%              | 4                        | 40%                      |
| Bachelor's degree                          | 49               | 74.2%            | 17                       | 25.8%                    |
| Professional qualification                 | 21               | 80.8%            | 5                        | 19.2%                    |
| Master's degree                            | 47               | 71.2%            | 19                       | 28.8%                    |
| Doctoral degree                            | 9                | 81.8%            | 2                        | 18.2%                    |
| Employment status                          |                  |                  |                          |                          |
| Long-term sick or disabled                 | 5                | 71.4%            | 2                        | 28.6%                    |
| Retired                                    | 7                | 87.5%            | 1                        | 12.5%                    |
| Working as an employee<br>from home        | 61               | 81.3%            | 14                       | 18.7%                    |
| Self-employed or freelance<br>from home    | 16               | 72.7%            | 6                        | 27.3%                    |
| Looking after home or<br>family            | 10               | 100%             | 0                        | 0%                       |
| Unemployed                                 | 3                | 75%              | 1                        | 25%                      |
| A furloughed employee                      | 16               | 64%              | 9                        | 36%                      |

|                                                               |     |       |    |       |
|---------------------------------------------------------------|-----|-------|----|-------|
| A student                                                     | 4   | 50%   | 4  | 50%   |
| Working as an employee in normal place of work (not home)     | 22  | 66.7% | 11 | 33.3% |
| Self-employed or freelance in normal place of work (not home) | 5   | 100%  | 0  | 0%    |
| Other                                                         | 9   | 75%   | 3  | 25%   |
| Key worker status                                             |     |       |    |       |
| Not key worker                                                | 116 | 76.3% | 36 | 23.7% |
| Key worker                                                    | 42  | 73.7% | 15 | 26.3% |
| <b>Housing factors</b>                                        |     |       |    |       |
| Housing situation                                             |     |       |    |       |
| Live in own home                                              | 85  | 85%   | 15 | 15%   |
| Live in rented home                                           | 55  | 67.1% | 27 | 32.9% |
| Live in rented room of multiple occupancy house               | 18  | 66.7% | 9  | 33.3% |
| Living with a vulnerable person                               |     |       |    |       |
| Living with person of vulnerable health status                | 21  | 91.3% | 2  | 8.7%  |
| Not living with person of vulnerable health status            | 137 | 73.7% | 49 | 26.3% |
| <b>Health factors</b>                                         |     |       |    |       |
| Vulnerable health                                             |     |       |    |       |
| Vulnerable                                                    | 19  | 73.1% | 7  | 26.9% |
| Not vulnerable                                                | 139 | 76%   | 44 | 24%   |
| <b>Political factors</b>                                      |     |       |    |       |
| 2019 General election                                         |     |       |    |       |
| Voted for Government                                          | 15  | 88.2% | 2  | 11.8% |
| Did not vote for Government                                   | 143 | 74.5% | 49 | 25.5% |
| Lockdown phase                                                |     |       |    |       |
| Total lockdown                                                | 63  | 78.8% | 17 | 21.3% |
| Overlap of total and first relaxation                         | 55  | 72.4% | 21 | 27.6% |
| First relaxation                                              | 40  | 75.5% | 13 | 24.5% |
| <b>Social factors</b>                                         |     |       |    |       |
| Financial support                                             |     |       |    |       |
| Getting financial support if needed                           | 123 | 76.4% | 38 | 23.6% |
| Not getting financial support if needed                       | 35  | 72.9% | 13 | 27.1% |
| Community support                                             |     |       |    |       |
| Getting community support if needed                           | 139 | 76.4% | 43 | 23.6% |
| Not getting community support if needed                       | 19  | 70.4% | 8  | 29.6% |

**Table S2.** Comparison of means of continuous explanatory variables between participants who did not adhere to SI rules and those who did.

| Explanatory variables                | Adherence<br>(Mean) | Adherence<br>(S.D.) | Non-<br>adherence<br>(Mean) | Non-<br>adherence<br>(S.D.) |
|--------------------------------------|---------------------|---------------------|-----------------------------|-----------------------------|
| <b>Demographic factors</b>           |                     |                     |                             |                             |
| Age                                  | 42.26               | 12.551              | 39.51                       | 11.668                      |
| Deprivation                          | 4.49                | 2.178               | 4.47                        | 2.004                       |
| <b>Housing factor</b>                |                     |                     |                             |                             |
| Number of people living with         | 2.77                | 1.341               | 2.41                        | 1.283                       |
| <b>Health factor</b>                 |                     |                     |                             |                             |
| Perceived susceptibility             | 5.42                | 1.507               | 5.39                        | 1.65                        |
| <b>Political factor</b>              |                     |                     |                             |                             |
| Trust in government                  | 2.85                | 1.519               | 3.13                        | 1.69                        |
| <b>Psychological factors</b>         |                     |                     |                             |                             |
| Covid-19 and SI/quarantine knowledge | 7.09                | 1.061               | 6.96                        | 1.166                       |
| Social responsibility                | 6.31                | 1.04                | 6                           | 1.02                        |
| Self-interest                        | 1.72                | 1.094               | 1.71                        | 1.026                       |
| Control over leaving the house       | 6.18                | 1.27                | 4.98                        | 1.71                        |
| Control over responsibilities        | 6.25                | 1.483               | 5.33                        | 2.142                       |
| Normative pressure                   | 6.08                | 1.048               | 5.72                        | 1.132                       |
| <b>Social factors</b>                |                     |                     |                             |                             |
| Support from a special person        | 5.69                | 1.817               | 5.41                        | 1.913                       |
| Support from family                  | 5.4                 | 1.72                | 5.16                        | 1.777                       |
| Support from friends                 | 5.5                 | 1.513               | 5.35                        | 1.423                       |

**Table S3.** Percentage of participants who did not adhere to quarantine rules and those who did by categorical explanatory variable.

| Explanatory variables                      | Adherence<br>(n) | Adherence<br>(%) | Non-<br>adherence<br>(n) | Non-<br>adherence<br>(%) |
|--------------------------------------------|------------------|------------------|--------------------------|--------------------------|
| Sample                                     | 158              | 62%              | 97                       | 38%                      |
| <b>Demographic Factors</b>                 |                  |                  |                          |                          |
| Gender                                     |                  |                  |                          |                          |
| Female                                     | 68               | 54.8%            | 56                       | 45.2%                    |
| Male                                       | 16               | 66.7%            | 8                        | 33.3%                    |
| Other                                      | 2                | 100%             | 0                        | 0%                       |
| Ethnicity                                  |                  |                  |                          |                          |
| White                                      | 76               | 57.1%            | 57                       | 42.9%                    |
| BAME                                       | 10               | 58.8%            | 7                        | 41.2%                    |
| Language                                   |                  |                  |                          |                          |
| English as first language                  | 75               | 60.5%            | 49                       | 39.5%                    |
| English not as first<br>language           | 11               | 42.3%            | 15                       | 57.7%                    |
| Religion                                   |                  |                  |                          |                          |
| No Religion                                | 45               | 47.9%            | 49                       | 52.1%                    |
| Christian                                  | 20               | 71.4%            | 8                        | 28.6%                    |
| Buddhist                                   | 2                | 66.7%            | 1                        | 33.3%                    |
| Hindu                                      | 1                | 100%             | 0                        | 0%                       |
| Jewish                                     | 13               | 86.7%            | 2                        | 13.3%                    |
| Muslim                                     | 3                | 75%              | 1                        | 25%                      |
| Sikh                                       | 1                | 100%             | 0                        | 0%                       |
| Other                                      | 1                | 25%              | 3                        | 75%                      |
| Highest qualification obtained             |                  |                  |                          |                          |
| No qualifications                          | 2                | 100%             | 0                        | 0%                       |
| GCSEs or equivalent                        | 9                | 81.8%            | 2                        | 18.2%                    |
| A Levels or equivalent                     | 4                | 66.7%            | 2                        | 33.3%                    |
| Vocational / work-related<br>qualification | 4                | 66.7%            | 2                        | 33.3%                    |
| Bachelor's degree                          | 21               | 43.8%            | 27                       | 56.3%                    |
| Professional qualification                 | 14               | 77.8%            | 4                        | 22.2%                    |
| Master's degree                            | 24               | 51.1%            | 23                       | 48.9%                    |
| Doctoral degree                            | 8                | 66.7%            | 4                        | 33.3%                    |
| Employment status                          |                  |                  |                          |                          |
| Long-term sick or disabled                 | 4                | 100%             | 0                        | 0%                       |
| Retired                                    | 1                | 33.3%            | 2                        | 66.7%                    |
| Working as an employee<br>from home        | 38               | 63.3%            | 22                       | 36.7%                    |
| Self-employed or freelance<br>from home    | 4                | 22.2%            | 14                       | 77.8%                    |
| Looking after home or<br>family            | 4                | 57.1%            | 3                        | 42.9%                    |
| Unemployed                                 | 2                | 66.7%            | 1                        | 33.3%                    |
| A furloughed employee                      | 14               | 70%              | 6                        | 30%                      |
| A student                                  | 3                | 50%              | 3                        | 50%                      |

|                                                               |    |       |    |       |
|---------------------------------------------------------------|----|-------|----|-------|
| Working as an employee in normal place of work (not home)     | 12 | 63.2% | 7  | 36.8% |
| Self-employed or freelance in normal place of work (not home) | 1  | 50%   | 1  | 50%   |
| Other                                                         | 3  | 37.5% | 5  | 62.5% |
| Key worker status                                             |    |       |    |       |
| Not key worker                                                | 59 | 57.8% | 43 | 42.2% |
| Key worker                                                    | 27 | 56.3% | 21 | 43.8% |
| <b>Housing factors</b>                                        |    |       |    |       |
| Housing situation                                             |    |       |    |       |
| Live in own home                                              | 45 | 60.8% | 29 | 39.2% |
| Live in rented home                                           | 25 | 47.2% | 28 | 52.8% |
| Live in rented room of multiple occupancy house               | 16 | 69.6% | 7  | 30.4% |
| Living with a vulnerable person                               |    |       |    |       |
| Living with person of vulnerable health status                | 18 | 69.2% | 8  | 30.8% |
| Not living with person of vulnerable health status            | 68 | 54.8% | 56 | 45.2% |
| <b>Health factors</b>                                         |    |       |    |       |
| Vulnerable health                                             |    |       |    |       |
| Vulnerable                                                    | 7  | 70%   | 3  | 30%   |
| Not vulnerable                                                | 79 | 56.4% | 61 | 43.6% |
| <b>Political factors</b>                                      |    |       |    |       |
| 2019 General election                                         |    |       |    |       |
| Voted for Government                                          | 11 | 78.6% | 3  | 21.4% |
| Did not vote for Government                                   | 75 | 55.1% | 61 | 44.9% |
| Lockdown phase                                                |    |       |    |       |
| Total lockdown                                                | 30 | 49.2% | 31 | 50.8% |
| Overlap of total and first relaxation                         | 35 | 60.3% | 23 | 39.7% |
| First relaxation                                              | 21 | 67.7% | 10 | 32.3% |
| <b>Social factors</b>                                         |    |       |    |       |
| Financial support                                             |    |       |    |       |
| Getting financial support if needed                           | 69 | 59%   | 48 | 41%   |
| Not getting financial support if needed                       | 17 | 51.5% | 16 | 48.5% |
| Community support                                             |    |       |    |       |
| Getting community support if needed                           | 75 | 56%   | 59 | 44%   |
| Not getting community support if needed                       | 11 | 68.8% | 5  | 31.3% |

**Table S4.** Comparison of means of continuous explanatory variables between participants who did not adhere to quarantine rules and those who did.

| Explanatory Variables                | Adherence<br>(Mean) | Adherence<br>(S.D.) | Non-<br>adherence<br>(Mean) | Non-<br>adherence<br>(S.D.) |
|--------------------------------------|---------------------|---------------------|-----------------------------|-----------------------------|
| <b>Demographic factors</b>           |                     |                     |                             |                             |
| Age                                  | 39.43               | 13.079              | 37.05                       | 10.614                      |
| Deprivation                          | 4.58                | 2.262               | 4.36                        | 2.058                       |
| <b>Housing factor</b>                |                     |                     |                             |                             |
| Number of people living with         | 3.37                | 1.389               | 3.28                        | 1.24                        |
| <b>Health factor</b>                 |                     |                     |                             |                             |
| Perceived susceptibility             | 5.4                 | 1.551               | 5.19                        | 1.5                         |
| <b>Political factor</b>              |                     |                     |                             |                             |
| Trust in government                  | 3.15                | 1.668               | 2.67                        | 1.43                        |
| <b>Psychological factors</b>         |                     |                     |                             |                             |
| Covid-19 and SI/quarantine knowledge | 6.95                | 1.005               | 7.2                         | 1.011                       |
| Social responsibility                | 6.34                | .876                | 5.98                        | 1.397                       |
| Self-interest                        | 1.69                | 1.055               | 1.97                        | 1.247                       |
| Control over leaving the house       | 6.37                | .812                | 5.45                        | 1.508                       |
| Control over responsibilities        | 6.29                | 1.354               | 5.39                        | 2.18                        |
| Normative pressure                   | 6.09                | 1.06                | 5.49                        | 1.25                        |
| <b>Social Factors</b>                |                     |                     |                             |                             |
| Support from a special person        | 6.12                | 1.275               | 6.03                        | 1.539                       |
| Support from family                  | 5.67                | 1.53                | 5.4                         | 1.446                       |
| Support from friends                 | 5.66                | 1.265               | 5.33                        | 1.365                       |

**Table S5.** Results of logistic regression, with binary outcome variable of non-adherence or adherence to SI rules (own symptoms)

| Explanatory Variables                   | Exp (B)   | 95% Wald Confidence Interval for Exp (B) |        | Sig.  |
|-----------------------------------------|-----------|------------------------------------------|--------|-------|
|                                         |           | Lower                                    | Upper  |       |
| Constant                                | .000      |                                          |        | .999  |
| <b>Demographic Factors</b>              |           |                                          |        |       |
| Gender                                  |           |                                          |        | .242  |
| Female                                  |           |                                          |        |       |
| Male                                    | 3.459     | .816                                     | 14.67  | .092  |
| Other                                   | .000      | .000                                     |        | .999  |
| Age                                     | .999      | .942                                     | 1.059  | .966  |
| Ethnicity                               |           |                                          |        |       |
| White                                   |           |                                          |        |       |
| BAME                                    | 1.731     | .325                                     | 9.213  | .52   |
| Language                                |           |                                          |        |       |
| English as First Language               |           |                                          |        |       |
| English Not as First Language           | 2.165     | .511                                     | 9.177  | .295  |
| Religion                                |           |                                          |        | .578  |
| No Religion                             |           |                                          |        |       |
| Christian                               | .000      | .000                                     |        | .999  |
| Buddhist                                | .000      | .000                                     |        | 1.000 |
| Hindu                                   | 1.242     | .025                                     | 61.632 | .914  |
| Jewish                                  | .000      | .000                                     |        | .999  |
| Muslim                                  | .000      | .000                                     |        | 1.000 |
| Sikh                                    | .896      | .017                                     | 47.628 | .957  |
| Other                                   | 5.447     | 1.228                                    | 24.159 | .026  |
| Highest Qualification Obtained          |           |                                          |        | .383  |
| No Qualifications                       |           |                                          |        |       |
| GCSEs or equivalent                     | 1.496E+9  | .000                                     |        | .999  |
| A Levels or equivalent                  | 769642475 | .000                                     |        | .999  |
| Vocational / Work-related Qualification | 3.971E+10 | .000                                     |        | .999  |
| Bachelors Degree                        | 4.080E+9  | .000                                     |        | .999  |
| Professional Qualification              | 1.967E+9  | .000                                     |        | .999  |
| Masters Degree                          | 4.411E+9  | .000                                     |        | .999  |
| Doctoral Degree                         | 1.803E+9  | .000                                     |        | .999  |
| Employment Status                       |           |                                          |        | .624  |
| Long-term sick or disabled              |           |                                          |        |       |
| Retired**                               | .005      | .000                                     | .732   | .037  |
| Working as an employee from home        | .066      | .002                                     | 2.187  | .128  |
| Self-employed or freelance from home    | .036      | .001                                     | 2.089  | .109  |
| Looking after home or family            | .000      | .000                                     |        | .998  |
| Unemployed                              | .006      | .000                                     | 1.364  | .065  |
| A furloughed employee                   | .123      | .004                                     | 4.339  | .249  |
| A student                               | .126      | .002                                     | 7.368  | .318  |

|                                                                  |        |      |         |      |
|------------------------------------------------------------------|--------|------|---------|------|
| Working as an employee in my normal place of work (not home)     | .154   | .003 | 7.128   | .339 |
| Self-employed or freelance in my normal place of work (not home) | .000   | .000 |         | .999 |
| Other                                                            | .026   | .000 | 1.672   | .086 |
| Key Worker Status                                                |        |      |         |      |
| Not Key Worker                                                   |        |      |         |      |
| Key Worker                                                       | 1.255  | .319 | 4.94    | .746 |
| Deprivation                                                      | 1.103  | .872 | 1.396   | .413 |
| <b>Housing Factors</b>                                           |        |      |         |      |
| Housing Situation                                                |        |      |         | .243 |
| Live in Own Home                                                 |        |      |         |      |
| Live in Rented Home                                              | 2.155  | .547 | 8.498   | .273 |
| Live in Rented Room of Multiple Occupancy House                  | .612   | .093 | 4.038   | .61  |
| Number of People Living With Living With a Vulnerable Person     | .991   | .609 | 1.612   | .971 |
| Living with Person of Vulnerable Health Status                   |        |      |         |      |
| Not Living with Person of Vulnerable Health Status               | 5.79   | .464 | 72.263  | .173 |
| <b>Health Factors</b>                                            |        |      |         |      |
| Vulnerable Health                                                |        |      |         |      |
| Vulnerable                                                       |        |      |         |      |
| Not Vulnerable                                                   | .579   | .101 | 3.325   | .54  |
| Perceived Susceptibility                                         | .839   | .572 | 1.23    | .369 |
| <b>Political Factors</b>                                         |        |      |         |      |
| 2019 General Election                                            |        |      |         |      |
| Voted for Government                                             |        |      |         |      |
| Did Not Vote for Government                                      | 10.196 | .267 | 389.817 | .212 |
| Trust in Government                                              | 1.357  | .987 | 1.865   | .06  |
| Lockdown Phase                                                   |        |      |         | .234 |
| Total Lockdown                                                   |        |      |         |      |
| Overlap of Total and First Relaxation                            | 2.525  | .733 | 8.7     | .142 |
| First Relaxation                                                 | 3.081  | .704 | 13.483  | .135 |
| <b>Psychological Factors</b>                                     |        |      |         |      |
| COVID-19 and Social Distancing Knowledge                         | .812   | .493 | 1.337   | .413 |
| Social Responsibility                                            | .774   | .478 | 1.252   | .297 |
| Self-Interest                                                    | .957   | .568 | 1.614   | .87  |
| Control over Leaving the House*                                  | .328   | .188 | .571    | .000 |
| Control over Responsibilities*                                   | .697   | .498 | .976    | .036 |
| Normative Pressure                                               | 1.432  | .786 | 2.61    | .241 |
| <b>Social Factors</b>                                            |        |      |         |      |
| Financial Support                                                |        |      |         |      |
| Getting Financial Support if Needed                              |        |      |         |      |



|                                            |       |      |       |      |
|--------------------------------------------|-------|------|-------|------|
| Not Getting Financial<br>Support If Needed | 1.233 | .249 | 6.11  | .797 |
| Community Support                          |       |      |       |      |
| Getting Community<br>Support if Needed     |       |      |       |      |
| Not Getting Community<br>Support If Needed | .285  | .038 | 2.135 | .222 |
| Support from a Special Person              | 1.065 | .746 | 1.522 | .728 |
| Support from Family                        | .936  | .545 | 1.605 | .809 |
| Support from Friends                       | 1.57  | .728 | 3.389 | .25  |

\*Significant predictors of non-adherence of SI rules (own symptoms). \*\*Significant association found, but below threshold of 10 units per cell.

**Table S6.** Results of logistic regression, with binary outcome variable of non-adherence or adherence to SI rules (co-habitant) symptoms.

| Explanatory Variables                   | Exp (B)    | 95% Wald Confidence Interval for Exp (B) |          | Sig.  |
|-----------------------------------------|------------|------------------------------------------|----------|-------|
|                                         |            | Lower                                    | Upper    |       |
| Constant                                | .000       |                                          |          | 1.000 |
| <b>Demographic Factors</b>              |            |                                          |          |       |
| Gender                                  |            |                                          |          | .242  |
| Female                                  |            |                                          |          |       |
| Male                                    | .154       | .019                                     | 1.251    | .08   |
| Other                                   | .000       | .000                                     |          | .999  |
| Age                                     | .945       | .856                                     | 1.043    | .261  |
| Ethnicity                               |            |                                          |          |       |
| White                                   |            |                                          |          |       |
| BAME                                    | .908       | .084                                     | 9.872    | .937  |
| Language                                |            |                                          |          |       |
| English as First Language               |            |                                          |          |       |
| English Not as First Language           | 2.708      | .461                                     | 15.919   | .27   |
| Religion                                |            |                                          |          | .606  |
| No Religion                             |            |                                          |          |       |
| Christian                               | .033       | .000                                     | 16.031   | .279  |
| Buddhist                                | .000       | .000                                     |          | 1.000 |
| Hindu                                   | 1.03       | .041                                     | 26.097   | .986  |
| Jewish                                  | .845       | .013                                     | 54.353   | .937  |
| Muslim                                  | .000       | .000                                     |          | 1.000 |
| Sikh                                    | 46.028     | .651                                     | 3255.416 | .078  |
| Other                                   | 2.05       | .373                                     | 11.272   | .409  |
| Highest Qualification Obtained          |            |                                          |          | .256  |
| No Qualifications                       |            |                                          |          |       |
| GCSEs or equivalent                     | .022       | .000                                     |          | 1.000 |
| A Levels or equivalent                  | .062       | .000                                     |          | 1.000 |
| Vocational / Work-related Qualification | .525       | .000                                     |          | 1.000 |
| Bachelors Degree                        | .102       | .000                                     |          | 1.000 |
| Professional Qualification              | .004       | .000                                     |          | 1.000 |
| Masters Degree                          | .05        | .000                                     |          | 1.000 |
| Doctoral Degree                         | .012       | .000                                     |          | 1.000 |
| Employment Status                       |            |                                          |          | .392  |
| Long-term sick or disabled              |            |                                          |          |       |
| Retired                                 | 6.363E+9   | .000                                     |          | .999  |
| Working as an employee from home        | 441697730  | .000                                     |          | .999  |
| Self-employed or freelance from home    | 6.565E+9   | .000                                     |          | .999  |
| Looking after home or family            | 935283619  | .000                                     |          | .999  |
| Unemployed                              | 1719732.19 | .000                                     |          | 1.000 |
| A furloughed employee                   | 136667899  | .000                                     |          | .999  |
| A student                               | 346474981  | .000                                     |          | .999  |

|                                                                  |           |       |          |      |
|------------------------------------------------------------------|-----------|-------|----------|------|
| Working as an employee in my normal place of work (not home)     | 137030989 | .000  |          | .999 |
| Self-employed or freelance in my normal place of work (not home) | 178410501 | .000  |          | .999 |
| Other                                                            | 537003621 | .000  |          | .999 |
| Key Worker Status                                                |           |       |          |      |
| Not Key Worker                                                   |           |       |          |      |
| Key Worker                                                       | 3.449     | .511  | 23.266   | .204 |
| Deprivation                                                      | .867      | .653  | 1.151    | .323 |
| <b>Housing Factors</b>                                           |           |       |          |      |
| Housing Situation                                                |           |       |          | .022 |
| Live in Own Home                                                 |           |       |          |      |
| Live in Rented Home                                              | 4.527     | .624  | 32.847   | .135 |
| Live in Rented Room of Multiple Occupancy House                  | .195      | .014  | 2.788    | .228 |
| Number of People Living With Living With a Vulnerable Person     | 1.473     | .785  | 2.766    | .228 |
| Living with Person of Vulnerable Health Status                   |           |       |          |      |
| Not Living with Person of Vulnerable Health Status               | .967      | .145  | 6.43     | .972 |
| <b>Health Factors</b>                                            |           |       |          |      |
| Vulnerable Health                                                |           |       |          |      |
| Vulnerable                                                       |           |       |          |      |
| Not Vulnerable                                                   | 7.752     | .223  | 269.575  | .258 |
| Perceived Susceptibility*                                        | .48       | .271  | .848     | .011 |
| <b>Political Factors</b>                                         |           |       |          |      |
| 2019 General Election                                            |           |       |          |      |
| Voted for Government                                             |           |       |          |      |
| Did Not Vote for Government                                      | 31.401    | .606  | 1628.005 | .087 |
| Trust in Government                                              | .796      | .526  | 1.207    | .283 |
| Lockdown Phase                                                   |           |       |          | .379 |
| Total Lockdown                                                   |           |       |          |      |
| Overlap of Total and First Relaxation                            | .34       | .062  | 1.854    | .212 |
| First Relaxation                                                 | .347      | .057  | 2.115    | .251 |
| <b>Psychological Factors</b>                                     |           |       |          |      |
| COVID-19 and Social Distancing Knowledge*                        | 3.066     | 1.325 | 7.097    | .009 |
| Social Responsibility                                            | 1.046     | .462  | 2.365    | .915 |
| Self-Interest                                                    | 1.542     | .698  | 3.406    | .284 |
| Control over Leaving the House*                                  | .3        | .122  | .737     | .009 |
| Control over Responsibilities                                    | .856      | .522  | 1.402    | .536 |
| Normative Pressure                                               | .639      | .294  | 1.39     | .258 |
| <b>Social Factors</b>                                            |           |       |          |      |
| Financial Support                                                |           |       |          |      |
| Getting Financial Support if Needed                              |           |       |          |      |

|                                                             |       |      |        |      |
|-------------------------------------------------------------|-------|------|--------|------|
| Not Getting Financial<br>Support If Needed                  | 1.929 | .359 | 10.349 | .444 |
| Community Support<br>Getting Community<br>Support if Needed |       |      |        |      |
| Not Getting Community<br>Support If Needed*                 | .055  | .004 | .754   | .03  |
| Support from a Special Person                               | 1.298 | .599 | 2.813  | .509 |
| Support from Family                                         | 1.916 | .792 | 4.639  | .149 |
| Support from Friends                                        | .426  | .17  | 1.066  | .068 |

\*Significant predictors of non-adherence of quarantine rules.
